# Supplementary material for: Degradation of the Incretin Hormone Glucagon-Like Peptide-1 (GLP-1) by Enterococcus faecalis Metalloprotease GelE
Source: PubMed Central journal article supplement (PMC7021470; doi:10.1128/msphere.00585-19), 2020-02-12

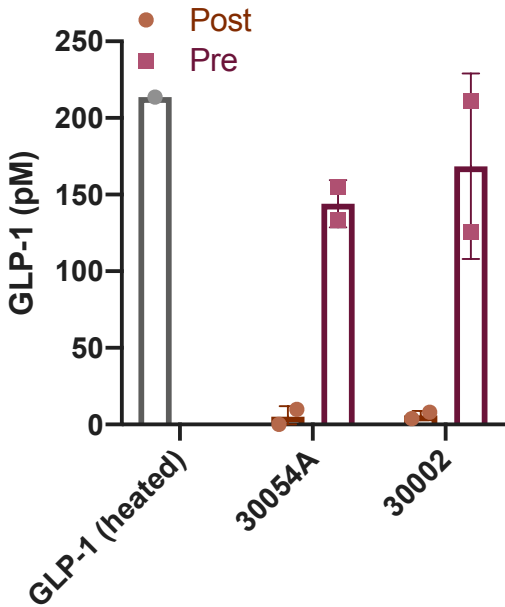

Supplement: mSphere.00585-19-sf004.pdf [file mSphere.00585-19-sf004.pdf]
